# Supplementary material for: Spondyloarthritis in inflammatory bowel disease cohorts: systematic literature review and critical appraisal of study designs
Source: HighWire-hosted journal article supplement (doi:10.1136/rmdopen-2021-001777), 2022-01-01
Supplement: rmdopen-2021-001777supp001_data_supplement.pdf [file rmdopen-2021-001777supp001_data_supplement.pdf]

Supplemental Table 1: Search Strategies

| Search | Terms Searched                                                                                                                                                                                                                                                                                                                                                                                       |
|--------|------------------------------------------------------------------------------------------------------------------------------------------------------------------------------------------------------------------------------------------------------------------------------------------------------------------------------------------------------------------------------------------------------|
| 1      | ("Inflammatory Bowel Diseases"[Majr]) AND ("Spondylarthritis"[Majr:NoExp] OR "Spondylitis, Ankylosing"[Mesh] OR "Spondylitis"[Majr:NoExp] OR "Arthritis"[Majr:NoExp] OR "Sacroiliitis"[Majr] OR "Spondylarthropathies"[Majr:NoExp])                                                                                                                                                                  |
| 2      | ("Inflammatory Bowel Diseases"[Title] OR "crohn's disease" [title] OR "ulcerative colitis" [title] OR "inflammatory bowel diseases" [title]) AND ("Spondylarthritis"[title] OR "Spondylitis, Ankylosing"[title] OR "Spondylitis"[title] OR "Sacroiliitis"[title] OR "Spondylarthropathies"[title] OR "back pain" [title] OR "articular" [title] OR "Musculoskeletal" [title] OR "arthritis" [title]) |
| 3      | "Enteropathic arthritis"                                                                                                                                                                                                                                                                                                                                                                             |
| 4      | ("Inflammatory Bowel Diseases"[Title] OR "crohn's disease" [title] OR "ulcerative colitis" [title] OR "inflammatory bowel diseases" [title]) AND ("Extra Intestinal Manifestations"[title] OR "Extraintestinal Manifestations" [title] OR "Extra-Intestinal Manifestations" [title])                                                                                                                 |
