# Supplementary material for: Spondyloarthritis in inflammatory bowel disease cohorts: systematic literature review and critical appraisal of study designs
Source: HighWire-hosted journal article supplement (doi:10.1136/rmdopen-2021-001777), 2022-01-01
Supplement: rmdopen-2021-001777supp002_data_supplement.pdf [file rmdopen-2021-001777supp002_data_supplement.pdf]

Supplemental Table 2: Variable Definitions

| Variable                           | Definition                                                                                                                                                                                                                                                                                                                                                                                                                                                                                                                                                                                                                                                    |
|------------------------------------|---------------------------------------------------------------------------------------------------------------------------------------------------------------------------------------------------------------------------------------------------------------------------------------------------------------------------------------------------------------------------------------------------------------------------------------------------------------------------------------------------------------------------------------------------------------------------------------------------------------------------------------------------------------|
| Setting                            | Population based cohort<br>Clinic/Hospital based cohort                                                                                                                                                                                                                                                                                                                                                                                                                                                                                                                                                                                                       |
| Setting                            | Single Center<br>Multicenter                                                                                                                                                                                                                                                                                                                                                                                                                                                                                                                                                                                                                                  |
| Design                             | Cross-sectional<br>Longitudinal                                                                                                                                                                                                                                                                                                                                                                                                                                                                                                                                                                                                                               |
| Duration of Follow up              | Time in years<br>(-) Not applicable or not reported                                                                                                                                                                                                                                                                                                                                                                                                                                                                                                                                                                                                           |
| Number of IBD Patients             | n                                                                                                                                                                                                                                                                                                                                                                                                                                                                                                                                                                                                                                                             |
| Type of IBD                        | IBD: Composite of Crohn's disease, ulcerative colitis, and IBD unspecified<br>Crohn's disease only<br>Ulcerative colitis only<br>IBD unspecified                                                                                                                                                                                                                                                                                                                                                                                                                                                                                                              |
| SpA Criteria                       | mNY<br>ASAS (axial, peripheral)<br>ESSG<br>Amor<br>Other (free text)<br>(-) Not applicable or not reported                                                                                                                                                                                                                                                                                                                                                                                                                                                                                                                                                    |
| MSK Phenotype                      | Physical examination by rheumatologist<br>Physical examination by a non-rheumatologist provider ("other")<br>Chart: Documentation / note review by any provider without physical exam<br>Subject self-report: patient questionnaire without physical exam<br>Physician Survey: Physician questionnaire without physical exam<br>(-) Not applicable or not reported                                                                                                                                                                                                                                                                                            |
| Direct Rheumatologist Involvement  | Yes: Explicitly mention of rheumatologist involvement in methods or body of paper OR author in rheumatology department<br>No                                                                                                                                                                                                                                                                                                                                                                                                                                                                                                                                  |
| SpA Phenotype                      | Ankylosing Spondylitis: Defined by clinical diagnosis, diagnosis from chart review, imaging, ICD coding or classification criteria<br>Axial SpA: Defined by clinical diagnosis, diagnosis from chart review, imaging, ICD 10 coding or classification criteria. Does not include inflammatory back pain alone unless called axial SpA.<br>Peripheral SpA: Defined by clinical diagnosis, diagnosis from chart review, imaging, ICD 10 coding or classification criteria.<br>SpA NOS: Reported SpA but study did not distinguish between axial and peripheral arthritis, or reported as mixed axial/peripheral arthritis<br>(-) Not applicable or not reported |
| Type of Axial Imaging and location | X-ray pelvis/SIJ<br>MRI pelvis/SIJ<br>CT pelvis/SIJ<br>X-ray spine<br>MRI spine<br>X-Ray Hip<br>MRI Hip<br>Total body bone scintigraphy<br>Gastrointestinal studies analyzed for axial phenotypes<br>Axial imaging with location not specified noted in table                                                                                                                                                                                                                                                                                                                                                                                                 |

|                                           |                                                                                                                                                                       |
|-------------------------------------------|-----------------------------------------------------------------------------------------------------------------------------------------------------------------------|
|                                           | (-) Not applicable or not reported                                                                                                                                    |
| Subjects imaged                           | Symptomatic<br>Asymptomatic<br>(-) Not applicable or not reported                                                                                                     |
| Distinction of arthritis sub-phenotype    | Yes<br>No                                                                                                                                                             |
| Pattern of joint disease described        | Mono- or Oligo-arthritis: <5 joints<br>Polyarthritis: ≥ 5 joints<br>Dactylitis<br>Enthesitis<br>Arthralgia: Study reported Arthralgia, or joint pain without swelling |
| Other Patterns of Joint Disease Described | [free text]                                                                                                                                                           |
| Peripheral Imaging                        | Ultrasound<br>X-Ray<br>Total Body Bone Scintigraphy<br>(-) Not applicable or not reported                                                                             |

IBD: inflammatory bowel disease, SpA: spondyloarthritis, mNY: Modified New York Criteria, ASAS: Assessment of Spondyloarthritis International Society, MSK: musculoskeletal, CT: CAT scan, MRI: magnetic resonance imaging, SIJ: sacroiliac joint
