# Supplementary material for: Spondyloarthritis in inflammatory bowel disease cohorts: systematic literature review and critical appraisal of study designs
Source: HighWire-hosted journal article supplement (doi:10.1136/rmdopen-2021-001777), 2022-01-01
Supplement: rmdopen-2021-001777supp003_data_supplement.pdf [file rmdopen-2021-001777supp003_data_supplement.pdf]

Supplemental Table 3: Study Characteristics – All Studies

| Study                         | Setting | Site | Design | Follow Up (Years) | IBD Patients (n) | IBD Type | SpA Criteria | MSK Evaluation | Rheum Input | SpA NOS                | AS                                                   | Axial SpA                      | Peripheral SpA                    |
|-------------------------------|---------|------|--------|-------------------|------------------|----------|--------------|----------------|-------------|------------------------|------------------------------------------------------|--------------------------------|-----------------------------------|
| Al-Jarallah, 2012[11]*        | Clinic  | SC   | CS     | -                 | 125              | CD/UC    | -            | Exam - other   | No          | CD: 32.1%<br>UC: 40.9% | -                                                    | CD: 3.7%<br>UC: 2.3%           | CD: 29.6%<br>UC: 36.4%            |
| Al-Jarallah, 2013[12]*        | Clinic  | SC   | CS     | -                 | 130              | CD/UC    | -            | Exam - other   | No          | CD: 31.7%<br>UC: 40%   | IBD: 8.5%                                            | CD: 11.8%<br>UC: 11.1%         | CD: 29.4%<br>UC: 35.6%            |
| Arora, 2010[74]               | Pop     | MC   | CS     | -                 | 3142             | CD/UC    | -            | Chart          | No          | -                      | IBD: 2.6%<br>CD: 2.0%<br>UC: 3.2%                    | -                              | IBD: 0.7%<br>CD: 0.9%<br>UC: 0.5% |
| Atay, 2019[75]                | Clinic  | SC   | CS     | -                 | 228              | CD/UC    | mNY          | Chart          | No          | -                      | CD: 7.0%<br>UC: 2.9%                                 | -                              | -                                 |
| Bae, 2017[76]                 | Pop     | MC   | CS     | -                 | 40843            | CD/UC    | -            | Chart          | Yes         | -                      | IBD: 0.5%<br>CD: 0.5%<br>UC: 0.5%                    | -                              | -                                 |
| Bandinelli, 2011[13]*         | Clinic  | SC   | CS     | -                 | 121              | CD/UC    | -            | Exam - rheum   | Yes         | -                      | -                                                    | -                              | -                                 |
| Bandinelli, 2014[14]*         | Clinic  | SC   | Long   | 3                 | 81               | CD/UC    | mNY          | Exam - rheum   | Yes         | -                      | -                                                    | CD: 29.1%<br>UC: 23.1%         | -                                 |
| Bandyopadhyay, 2015[15]*      | Clinic  | SC   | CS     | -                 | 120              | CD/UC    | ASAS (A)     | Exam - rheum   | Yes         | -                      | IBD: 18%<br>CD: 19%<br>UC: 16%                       | IBD: 20%<br>CD: 21%<br>UC: 19% | IBD: 23%<br>CD: 24%<br>UC: 21%    |
| Barreiro-de Acosta, 2007[16]* | Clinic  | SC   | CS     | -                 | 173              | CD       | -            | Exam - rheum   | Yes         | -                      | CD: 2.3%                                             | CD: 6.9%                       | CD: 17.9%                         |
| Bernstein, 2001[77]           | Pop     | MC   | CS     | -                 | 4544             | CD/UC    | -            | Chart          | No          | -                      | Male <sup>1</sup><br>IBD: 4.2%<br>CD: 5.7%<br>UC: 3% | -                              | -                                 |
|                               |         |      |        |                   |                  |          |              |                |             |                        | Female<br>IBD: 4%<br>CD: 4.3%<br>UC: 3.6%            |                                |                                   |

|                          |        |    |      |   |       |       |            |                    |     |                                                                             |                                    |                                                                                            |                                     |
|--------------------------|--------|----|------|---|-------|-------|------------|--------------------|-----|-----------------------------------------------------------------------------|------------------------------------|--------------------------------------------------------------------------------------------|-------------------------------------|
| Bertolini, 2020[17]*     | Clinic | MC | CS   | - | 148   | CD/UC | ASAS (A/P) | Exam - rheum       | Yes | IBD: 37.8%<br>CD: 30.8%<br>UC: 41.5%                                        | -                                  | IBD: 8.1%<br>CD: 5.9%<br>UC: 10.4%                                                         | IBD: 29.7%<br>CD: 25%<br>UC: 31.2%  |
| Beslek, 2009[18]*        | Clinic | SC | CS   | - | 122   | CD/UC | mNY, ESSG  | Exam - rheum       | Yes | IBD: 28.7%<br>CD: 57.1%<br>UC: 20.2%                                        | IBD: 8.2%<br>CD: 14.3%<br>UC: 6.4% | -                                                                                          | IBD: 15.6%<br>CD: 39.3%<br>UC: 8.5% |
| Bruining, 2008[78]       | Clinic | SC | CS   | - | 357   | CD    | -          | Chart              | No  | -                                                                           | -                                  | CD: 2.2%                                                                                   | -                                   |
| Card, 2016[79]           | Pop    | MC | CS   | - | 56097 | CD/UC | -          | Chart              | No  | Arthritis NOS<br>IBD: 20.7%<br>CD: 19.1%<br>UC: 20.0%                       | IBD: 1.1%<br>CD: 1.3%<br>UC: 0.9%  | IBD: 0.7%<br>CD: 0.7%<br>UC: 0.6%                                                          | -                                   |
|                          |        |    |      |   |       |       |            |                    |     | "All other inflammatory arthropathies"<br>IBD: 1.4%<br>CD: 1.6%<br>UC: 1.1% |                                    |                                                                                            |                                     |
| Christodoulou, 2002[19]* | Clinic | SC | CS   | - | 256   | CD/UC | -          | Self-report, chart | No  | -                                                                           | -                                  | CD: 16.2%<br>UC: 4.2%                                                                      | CD: 5.4%<br>UC: 2.3%                |
| D'Inca, 2009[20]*        | Clinic | MC | Long | 1 | 651   | CD/UC | ESSG, mNY  | Exam - rheum       | Yes | -                                                                           | IBD: 1.4%<br>CD: 1.9%<br>UC: 1%    | IBD: 4.9%<br>CD: 7.5%<br>UC: 3.1%                                                          | IBD: 3.7%<br>CD: 5.6%<br>UC: 2.3%   |
| De Kock, 2017[80]        | Clinic | SC | CS   | - | 80    | CD    | ASAS (A)   | Chart              | No  | -                                                                           | -                                  | CT<br>Erosions<br>CD: 22.5%<br>CT<br>Sclerosis<br>CD: 21.3%<br>CT<br>Ankylosis<br>CD: 7.5% | -                                   |

|                            |        |    |      |    |      |       |            |                    |     |                                                 |                                 |                                      | CT<br>Syndesmo<br>pytes<br>CD: 7.5%  |
|----------------------------|--------|----|------|----|------|-------|------------|--------------------|-----|-------------------------------------------------|---------------------------------|--------------------------------------|--------------------------------------|
| De Vlam, 2000[21]*         | Clinic | SC | CS   | -  | 103  | CD/UC | ESSG, mNY  | Exam - rheum       | Yes | IBD: 35%<br>CD: 32%<br>UC: 44%                  | IBD: 10%<br>CD: 9%<br>UC: 12%   | IBD: 32%<br>CD: 35%<br>UC: 24%       | IBD: 10%<br>CD: 9%<br>UC: 12%        |
| Ditisheim, 2015[22]*       | Pop    | MC | CS   | -  | 2401 | CD/UC | ASAS (P)   | Self-report        | Yes | IBD: 25.4% <sup>2</sup><br>CD: 28%<br>UC: 21.9% | -                               | -                                    | IBD: 18.6%<br>CD: 21.2%<br>UC: 15.1% |
| Dmowska-Chalaba, 2015[23]* | Clinic | SC | CS   | -  | 51   | CD/UC | ASAS (A/P) | Exam - other       | Yes | IBD: 56.9%<br>CD: 58.3%<br>UC: 55.6%            | -                               | IBD: 43.1%                           | -                                    |
| Dorofeyev, 2009[81]        | Clinic | SC | CS   | -  | 319  | UC    | -          | Exam - other       | No  | UC: 15.1%                                       | -                               | -                                    | -                                    |
| Duricova, 2017[24]*        | Pop    | MC | CS   | -  | 628  | UC    | -          | Exam - other       | No  | UC: 6%                                          | -                               | UC: 1.5%                             | UC: 4.2%                             |
| Fatemi, 2016[25]*          | Clinic | SC | CS   | -  | 273  | CD/UC | mNY        | Exam - rheum       | Yes | -                                               | CD: 2.1%<br>UC: 0%              | -                                    | CD: 5.2%<br>UC: 4%                   |
| Gotler, 2015[26]*          | Clinic | SC | CS   | -  | 286  | CD/UC | ASAS (A)   | Self-report, chart | Yes | -                                               | -                               | IBD: 9.1% <sup>3</sup>               | -                                    |
| Hammoudeh, 2018[27]*       | Clinic | SC | CS   | -  | 127  | CD/UC | ASAS (A/P) | Exam - rheum       | Yes | IBD: 11%<br>CD: 10.9%<br>UC: 11.1%              | IBD: 3.2%                       | IBD: 3.2%<br>CD: 6.5%<br>UC: 1.2%    | IBD: 43.3%<br>CD: 41.3%<br>UC: 44.4% |
| Hiller, 2019[28]*          | Pop    | MC | Long | -  | 3298 | CD/UC | -          | Exam - other       | Yes | CD: 48.8% <sup>4</sup><br>UC/IBDU: 34.6%        | CD: 6.9%<br>UC/IBDU: 3.1%       | -                                    | -                                    |
| Hwangbo, 2010[82]          | Clinic | SC | CS   | -  | 163  | CD/UC | mNY        | Chart              | No  | -                                               | -                               | IBD: 16.6%<br>CD: 20.1%<br>UC: 12.2% | -                                    |
| Isene, 2015[29]*           | Pop    | MC | Long | 10 | 1145 | CD/UC | -          | Exam - other       | Yes | -                                               | CD: 1.6% <sup>5</sup><br>UC: 1% | CD: 2.1% <sup>5</sup><br>UC: 1.5%    | CD: 9.1% <sup>5</sup><br>UC: 5.5%    |
| Kamo, 2015[30]*            | Clinic | SC | CS   | -  | 137  | CD/UC | -          | Self-report        | No  | -                                               | -                               | -                                    | IBD: 40.9% <sup>6</sup>              |

|                              |        |    |      |    |      |       |                  |                          |     |                                      |                                   |                                     |                                                  |
|------------------------------|--------|----|------|----|------|-------|------------------|--------------------------|-----|--------------------------------------|-----------------------------------|-------------------------------------|--------------------------------------------------|
| Karmiris, 2016[31]*          | Clinic | MC | CS   | -  | 1860 | CD/UC | -                | Exam -<br>rheum          | Yes | -                                    | IBD: 2.1%<br>CD: 3.4%<br>UC: 0.6% | IBD: 4.6%<br>CD: 7%<br>UC: 1.9%     | IBD:<br>11.9%<br>CD: 15.5%<br>UC: 7.7%           |
| Kelly, 2019[83]              | Clinic | SC | CS   | -  | 316  | CD/UC | Other#           | Chart                    | Yes | -                                    | -                                 | IBD:<br>15.5%<br>CD: 14.6%          | IBD:<br>12.4%                                    |
| Lakatos, 2003[32]*           | Clinic | SC | Long | 25 | 873  | CD/UC | -                | Exam -<br>rheum          | Yes | -                                    | -                                 | CD: 10.2%<br>UC: 3.2%               | CD: 14.6%<br>UC: 4.9%                            |
| Lanna, 2008[33]*             | Clinic | SC | CS   | -  | 130  | CD/UC | mNY              | Exam -<br>rheum          | Yes | IBD: 16.2%<br>CD: 19.7%<br>UC: 11.9% | IBD: 6.2%<br>CD: 11.3%<br>UC: 0%  | IBD: 9.2%<br>CD: 14.1%<br>UC: 3.4%  | IBD: 3.9%<br>CD: 5.6%<br>UC: 1.7%                |
| Leclerc-Jacob, 2014[84]      | Clinic | SC | CS   | -  | 186  | CD/UC | ASAS (A)         | Chart                    | Yes | -                                    | -                                 | IBD:16.7%<br>CD: 17.6%<br>UC: 14.6% | -                                                |
| Liu, 2016[85]                | Clinic | SC | CS   | -  | 194  | CD    | mNY              | Chart                    | No  | -                                    | CD: 4.1%                          | -                                   | -                                                |
| Luchetti 2019[34]*           | Clinic | SC | Long | 2  | 262  | CD/UC | ASAS<br>(A/P)    | Exam -<br>rheum          | Yes | IBD: 30.5%<br>CD: 28.9%<br>UC:33.3%  | IBD: 2.7%                         | IBD:<br>14.9%                       | IBD:<br>15.7%                                    |
| Malaty, 2017[86]             | Clinic | SC | CS   | -  | 626  | CD/UC | -                | Chart                    | No  | -                                    | IBD: 2.1%<br>CD: 2.1%<br>UC: 1.9% | -                                   | IBD: 7%<br>CD: 8%<br>UC: 6%                      |
| Mocelin, 2015[35]*           | Clinic | SC | CS   | -  | 100  | CD    | ASAS<br>(A/P)    | Chart                    | Yes | CD: 6%                               | CD: 3%                            | CD: 2%                              | CD: 1%                                           |
| Nguyen, 2006[87]             | Clinic | MC | CS   | -  | 1126 | CD/UC | -                | Chart                    | No  | -                                    | IBD: 1.2%                         | IBD: 2.1%                           | -                                                |
| Orchard, 2009[36]*           | Clinic | SC | CS   | -  | 44   | CD    | mNY^             | Exam -<br>other          | No  | -                                    | CD: 18.2%                         | CD: 38.6%                           | -                                                |
| Ossum 2018: Axial[37]*       | Pop    | MC | CS   | -  | 470  | CD/UC | ASAS (A),<br>mNY | Self-report <sup>7</sup> | Yes | -                                    | IBD: 4.5%<br>CD: 5.1%<br>UC: 4.1% | IBD: 7.7%<br>CD: 10.9%<br>UC: 6.1%  | -                                                |
| Ossum, 2018: Peripheral[38]* | Pop    | MC | CS   | -  | 470  | CD/UC | ASAS (P)         | Self-report <sup>7</sup> | Yes | -                                    | -                                 | -                                   | pSpA:<br>IBD:<br>26.1%<br>CD: 26.2%<br>UC: 28.7% |
|                              |        |    |      |    |      |       |                  |                          |     |                                      |                                   |                                     | pArthritis:                                      |

|                                       |        |    |      |               |     |       |                       |                                       |     |                                                                                               |                                   |                                         |                                         |                                         |
|---------------------------------------|--------|----|------|---------------|-----|-------|-----------------------|---------------------------------------|-----|-----------------------------------------------------------------------------------------------|-----------------------------------|-----------------------------------------|-----------------------------------------|-----------------------------------------|
|                                       |        |    |      |               |     |       |                       |                                       |     |                                                                                               |                                   |                                         |                                         | IBD:<br>16.2%<br>CD: 19.3%<br>UC: 16.2% |
| Ozdil, 2004[88]                       | Clinic | SC | Long | 5±2<br>(mean) | 116 | UC    | -                     | Chart                                 | No  | -                                                                                             | -                                 | UC: 12.1%                               | UC: 1.7%                                |                                         |
| Palm, 2001[39]*                       | Pop    | MC | CS   | -             | 521 | CD/UC | mNY                   | Exam -<br>rheum                       | Yes | -                                                                                             | IBD: 1.3%                         | -                                       | IBD:<br>11.9%<br>CD: 14.3%<br>UC: 10.8% |                                         |
| Palm, 2002[40]*                       | Pop    | MC | CS   | -             | 406 | CD/UC | mNY,<br>ESSG          | Exam -<br>rheum                       | Yes | -                                                                                             | IBD: 3.7%<br>CD: 6.0%<br>UC: 2.6% | IBD: 1% <sup>8</sup>                    | -                                       |                                         |
| Paparo, 2012[89]                      | Clinic | SC | CS   | -             | 221 | CD    | Other <sup>##</sup>   | Chart                                 | No  | -                                                                                             | -                                 | CD: 24%                                 | -                                       |                                         |
| Peeters,<br>2008[41]*                 | Clinic | MC | CS   | -             | 251 | CD    | mNY                   | Chart                                 | Yes | -                                                                                             | CD: 6.4%                          | CD: 25.9%                               | CD: 28.7%                               |                                         |
| Picchianti-<br>Diamanti,<br>2020[42]* | Clinic | MC | CS   | -             | 347 | CD/UC | ASAS<br>(A/P)         | Exam -<br>rheum                       | Yes | -                                                                                             | -                                 | -                                       | -                                       |                                         |
| Pokharna,<br>2004[43]*                | Clinic | SC | CS   | -             | 46  | UC    | mNY                   | Other<br>provider<br>physical<br>exam | No  | -                                                                                             | -                                 | UC: 0%                                  | UC: 2.2%                                |                                         |
| Queiro,<br>2000[44]*                  | Clinic | SC | Long | 4             | 62  | CD/UC | Amor,<br>ESSG,<br>mNY | Exam -<br>other                       | Yes | Amor:<br>IBD: 11.3%<br>CD: 11.4%<br>UC: 11.1%<br>ESSG:<br>IBD: 18.8%<br>CD: 8.6%<br>UC: 14.8% | IBD:3.2%<br>CD:2.9%<br>UC:3.7%    | IBD:<br>24.2%<br>CD: 22.9%<br>UC: 25.9% | IBD:<br>30.7%<br>CD: 28.6%<br>UC: 33.3% |                                         |
| Repiso, 2006[90]                      | Clinic | SC | CS   | -             | 157 | CD    | -                     | Chart                                 | No  | CD: 1.9%                                                                                      | -                                 | CD: 5.7%                                | CD: 3.8%                                |                                         |
| Ricart, 2004[45]*                     | Clinic | SC | CS   | -             | 243 | CD/UC | -                     | Self-report                           | No  | -                                                                                             | IBD: 3.7%<br>CD: 6.5%<br>UC: 0%   | -                                       | -                                       |                                         |
| Rovisco,<br>2016[46]*                 | Clinic | SC | CS   | -             | 76  | CD/UC | ASAS<br>(A/P)         | Exam -<br>rheum                       | Yes | -                                                                                             | -                                 | -                                       | -                                       |                                         |

|                        |        |    |    |   |     |       |                                |                       |     |                                          |                                    |                                         |                                                   |
|------------------------|--------|----|----|---|-----|-------|--------------------------------|-----------------------|-----|------------------------------------------|------------------------------------|-----------------------------------------|---------------------------------------------------|
| Sahli, 2018[47]*       | Clinic | SC | CS | - | 64  | CD/UC | ASAS (A),<br>Amor              | Exam -<br>rheum       | Yes | -                                        | IBD:<br>26.5%                      | IBD:<br>14.1% <sup>9</sup>              | -                                                 |
| Salvarani, 2001[48]*   | Clinic | MC | CS | - | 160 | CD/UC | mNY,<br>ESSG                   | Exam -<br>rheum       | Yes | IBD: 18.1%<br>CD: 18.6%<br>UC: 17.3%     | IBD: 3.1%<br>CD: 5.1%<br>UC: 2%    | IBD: 3.6%<br>CD: 5.9%<br>UC: 2.4%       | IBD:<br>10.6%<br>CD: 10.2%<br>UC: 11.2%           |
| Shivashankar, 2012[91] | Pop    | MC | CS | - | 311 | CD    | ESSG,ASAS<br>(A/P),<br>mNY     | Chart                 | Yes | CD: 14.5%                                | CD: 0.6%                           | CD: 1.6%                                | CD: 7.1%                                          |
| Shivashankar, 2013[92] | Pop    | MC | CS | - | 365 | UC    | ESSG,<br>ASAS<br>(A/P),<br>mNY | Chart                 | Yes | UC:<br>14.8%<br>(ASAS)<br>3.6%<br>(ESSG) | UC: 0.3%                           | UC: 1.6%                                | UC: 4.7%                                          |
| Singla, 2017[93]       | Clinic | SC | CS | - | 209 | CD    | -                              | Chart                 | No  | CD: 2.9%                                 | CD: 1%                             | CD: 2.4%                                | -                                                 |
| Steer, 2003[49]*       | Clinic | SC | CS | - | 134 | CD    | mNY                            | Exam -<br>other       | Yes | -                                        | CD: 6.7%                           | CD: 23.1%                               | -                                                 |
| Stolwijk, 2013[50]*    | Clinic | SC | CS | - | 350 | CD/UC | -                              | Self-report,<br>chart | Yes | -                                        | -                                  | IBD: 5.1%<br>CD: 6.3%<br>UC: 3.7%       | pSpA<br>IBD: 5.7%<br>CD: 7.3%<br>UC: 3.7%         |
|                        |        |    |    |   |     |       |                                |                       |     |                                          |                                    |                                         | pArthritis:<br>IBD: 9.4%<br>CD: 12.1%<br>UC: 5.1% |
| Subramaniam, 2015[51]* | Clinic | SC | CS | - | 140 | CD/UC | ASAS<br>(A/P)                  | Self-report,<br>chart | Yes | IBD: 33.6%<br>CD: 37.5%<br>UC: 25%       | IBD: 4.3%                          | IBD:<br>11.4%<br>CD: 12.5%<br>UC: 9.1%  | IBD: 41%                                          |
| Tureyen, 2002[94]      | Clinic | SC | CS | - | 62  | CD/UC | mNY                            | Chart                 | No  | -                                        | IBD: 4.8%<br>CD: 6.9%<br>UC: 3%    | IBD:<br>27.4%<br>CD: 24.1%<br>UC: 30.3% | -                                                 |
| Turkcapar, 2006[52]*   | Clinic | SC | CS | - | 162 | CD/UC | mNY,<br>ESSG                   | Exam -<br>rheum       | Yes | IBD: 45.7%<br>CD: 48.7%<br>UC: 42.8%     | IBD: 9.9%<br>CD: 11.5%<br>UC: 8.3% | IBD:<br>45.7%<br>CD: 48.7%<br>UC: 42.8% | IBD:<br>14.8%<br>CD: 15.4%<br>UC: 14.3%           |

|                            |        |    |      |   |     |       |                             |                  |     |            |                                   |           |                                      |
|----------------------------|--------|----|------|---|-----|-------|-----------------------------|------------------|-----|------------|-----------------------------------|-----------|--------------------------------------|
| Van Erp, 2016[53]*         | Clinic | SC | Long | 1 | 255 | CD/UC | ASAS (A/P), Amor, ESSG, mNY | Exam - other     | Yes | IBD: 40.6% | IBD: 2.6%                         | IBD: 3.9% | IBD: 9.7%                            |
| Vavricka, 2011[1]*         | Pop    | MC | CS   | - | 950 | CD/UC | -                           | Physician survey | No  | -          | IBD: 4.1%<br>CD: 5.7%<br>UC: 1.6% | -         | IBD: 28.6%<br>CD: 33.3%<br>UC: 21.3% |
| Yamamoto-Furusho, 2018[95] | Clinic | SC | CS   | - | 295 | UC    | -                           | Chart            | No  | -          | UC: 2.7%                          | UC: 5.4%  | UC: 46.8%                            |
| Yi, 2012[96]               | Clinic | SC | CS   | - | 153 | CD    | -                           | Chart            | No  | CD: 4.6%   | CD: 0.7%                          | -         | -                                    |
| Yuksel, 2011[54]*          | Clinic | SC | CS   | - | 357 | CD/UC | -                           | Exam - rheum     | Yes | -          | -                                 | -         | IBD: 18.5%<br>CD: 28.3%<br>UC: 13.5% |
| Zippi, 2014[97]            | Clinic | SC | CS   | - | 811 | CD/UC | -                           | Chart            | No  | -          | IBD 1.6%:<br>CD: 2.3%<br>UC: 1.4% | -         | IBD: 28%<br>CD: 30.6%<br>UC: 27.1%   |

Pop: population, SC: single center, MC: multicenter, Long: longitudinal, CD: Crohn's disease, UC: ulcerative colitis, IBDU: inflammatory bowel disease unspecified, Rheum: Rheumatologist, SpA: spondyloarthritis, AS: ankylosing spondylitis, pSpA: peripheral SpA, A: axial, P: peripheral, mNY: Modified New York Criteria, ESSG: European Spondyloarthropathy Study Group, Rheum: rheumatologist, IBD: inflammatory bowel disease, #: Number, Yrs: years

<sup>1</sup> Patients with ≥ 1 contact with health system

<sup>2</sup> Mixed inflammatory articular disease

<sup>3</sup> 2009 ASAS MRI criteria

<sup>4</sup> "Arthritis/arthritis," did not distinguish between the two entities

<sup>5</sup> First extraintestinal manifestation only

<sup>6</sup> Mono, oligo, and polyarthralgia, did not mention arthritis

<sup>7</sup> Used rheumatologist physical exam from 5 year follow up study

<sup>8</sup> Reported 1% based on patients who had imaging. Estimated prevalence 2% based on expected results if imaged all patients

<sup>9</sup> Isolated sacroiliitis

\* Prospectively enrolled

# Chan ARD 2015

## Dale Acta Radiol Diag 1985

^ Adapted for MRI
